# Supplementary material for: Hepatic sinusoidal obstruction syndrome and short-term application of 6-thioguanine in pediatric acute lymphoblastic leukemia
Source: PubMed Central journal article supplement (PMC8410596; doi:10.1038/s41375-021-01203-7), 2021-03-13

**Supplementary table 1. Treatment details of protocol AIEOP-BFM ALL 2000.**

| Treatment phase/drug <sup>a</sup>                                                                                                                                                                                                                                                                        | Single or daily dose                                                                                                                                                                                                            | Days of application per phase <sup>a</sup>                                                                                        |
|----------------------------------------------------------------------------------------------------------------------------------------------------------------------------------------------------------------------------------------------------------------------------------------------------------|---------------------------------------------------------------------------------------------------------------------------------------------------------------------------------------------------------------------------------|-----------------------------------------------------------------------------------------------------------------------------------|
| <u>Prephase</u><br>Prednisone (PO/IV)<br>Methotrexate (IT)                                                                                                                                                                                                                                               | 60 mg/m <sup>2</sup> /d<br>12 mg/dose <sup>b</sup>                                                                                                                                                                              | 1-7<br>1                                                                                                                          |
| <u>Induction</u><br><i>Protocol IA</i><br>Prednisone/Prednisolone (PO/IV) or <sup>c</sup><br>Dexamethasone (PO/IV)<br>Vincristine (IV)<br>Daunorubicin (PI over 1 h)<br>L-Asparaginase (PI over 1 h)<br>Methotrexate (IT)                                                                                | 60 mg/m <sup>2</sup> /d<br>10 mg/m <sup>2</sup> /d<br>1.5 mg/m <sup>2</sup> /dose (max 2 mg)<br>30 mg/m <sup>2</sup> /dose<br>5000 IU/m <sup>2</sup> /dose<br>12 mg/dose <sup>b</sup>                                           | 8-28 <sup>d</sup><br>8-28 <sup>d</sup><br>8, 15, 22, 29<br>8, 15, 22, 29<br>12, 15, 18, 21, 24, 27, 30, 33<br>12, 33 <sup>e</sup> |
| <u>Consolidation</u><br><i>Protocol IB</i><br>Cyclophosphamide (PI over 1 h)<br>Cytarabine (IV)<br>6-Mercaptopurine (PO)<br>Methotrexate (IT)                                                                                                                                                            | 1000 mg/m <sup>2</sup> /dose<br>75 mg/m <sup>2</sup> /dose<br>60 mg/m <sup>2</sup> /d<br>12 mg/dose <sup>b</sup>                                                                                                                | 36, 64<br>38-41, 45-48, 52-55, 59-62<br>36-63<br>45, 59                                                                           |
| <u>Extra-Compartment Therapy</u><br><u>(only SR/MR)</u><br><i>Protocol M:</i><br>6-Mercaptopurine (PO)<br>Methotrexate (PI over 24 h) <sup>f</sup><br>Methotrexate (IT)                                                                                                                                  | 25 mg/m <sup>2</sup> /d<br>5000 mg/m <sup>2</sup> /dose<br>12 mg/dose <sup>b</sup>                                                                                                                                              | 1-56<br>8, 22, 36, 50<br>8, 22, 36, 50                                                                                            |
| <u>Intensive Consolidation (only HR)</u><br><i>Element HR-1'</i><br>Dexamethasone (PO/IV)<br>Vincristine (IV)<br>Methotrexate (PI over 24 h) <sup>f</sup><br>Cyclophosphamide (PI over 1 h)<br>Cytarabine (PI over 3 h)<br>L-Asparaginase (PI over 2 h)<br>Methotrexate/Cytarabine/<br>Prednisolone (IT) | 20 mg/m <sup>2</sup> /d<br>1.5 mg/m <sup>2</sup> (max 2 mg)<br>5000 mg/m <sup>2</sup> /dose<br>200 mg/m <sup>2</sup> /dose<br>2 g/m <sup>2</sup> /dose<br>25,000 IU/m <sup>2</sup> /dose<br>12/30/10 mg/dose <sup>b</sup>       | 1-5<br>1, 6<br>1<br>2-4 (5 doses, 12 h intervals)<br>5 (2 doses, 12 h interval)<br>6, 11<br>1                                     |
| <i>Element HR-2'</i><br>Dexamethasone (PO/IV)<br>Vindesine (IV)<br>Methotrexate (PI over 24 h) <sup>f</sup><br>Ifosfamide (PI over 1 h)<br>Daunorubicin (PI over 24 h)<br>L-Asparaginase (PI over 2 h)<br>Methotrexate/Cytarabine/<br>Prednisolone (IT)                                                  | 20 mg/m <sup>2</sup> /d<br>3 mg/m <sup>2</sup> /dose (max 5 mg)<br>5000 mg/m <sup>2</sup> /dose<br>800 mg/m <sup>2</sup> /dose<br>30 mg/m <sup>2</sup> /dose<br>25,000 IU/m <sup>2</sup> /dose<br>12/30/10 mg/dose <sup>b</sup> | 1-5<br>1, 6<br>1<br>2-4 (5 doses, 12 h intervals)<br>5<br>6, 11<br>1 <sup>g</sup>                                                 |

| Treatment phase/drug <sup>a</sup>                                                                                                                                                                                                                  | Single or daily dose                                                                                                                                                                                                                                  | Days of application per phase <sup>a</sup>                                                                                 |
|----------------------------------------------------------------------------------------------------------------------------------------------------------------------------------------------------------------------------------------------------|-------------------------------------------------------------------------------------------------------------------------------------------------------------------------------------------------------------------------------------------------------|----------------------------------------------------------------------------------------------------------------------------|
| <i>Element HR-3'</i><br>Dexamethasone (PO/IV)<br>Cytarabine (PI over 3 h)<br>Etoposide (PI over 1 h)<br>L-Asparaginase (PI over 2 h)<br>Methotrexate/Cytarabine/<br>Prednisolone (IT)                                                              | 20 mg/m <sup>2</sup> /d<br>2 g/m <sup>2</sup> /dose<br>100 mg/m <sup>2</sup> /dose<br>25,000 IU/m <sup>2</sup> /dose<br>12/30/10 mg/dose <sup>b</sup>                                                                                                 | 1-5<br>1-2 (4 doses, 12 h intervals)<br>3-5 (5 doses, 12 h intervals)<br>6, 11<br>5                                        |
| <u>Reinduction</u><br><i>Protocol II</i><br>Dexamethasone (PO/IV)<br>Vincristine (IV)<br>Doxorubicin (PI over 1 h)<br>L-Asparaginase (PI over 1 h)<br>Cyclophosphamide (PI over 1 h)<br>Cytarabine (IV)<br>6-Thioguanine (PO)<br>Methotrexate (IT) | 10 mg/m <sup>2</sup> /d<br>1.5 mg/m <sup>2</sup> /dose (max 2 mg)<br>30 mg/m <sup>2</sup> /dose<br>10,000 IU/m <sup>2</sup> /dose<br>1000 mg/m <sup>2</sup> /dose<br>75 mg/m <sup>2</sup> /dose<br>60 mg/m <sup>2</sup> /d<br>12 mg/dose <sup>b</sup> | 1-21 <sup>d</sup><br>8, 15, 22, 29<br>8, 15, 22, 29<br>8, 11, 15, 18<br>36<br>38-41, 45-48<br>36-49<br>45, 59 <sup>g</sup> |
| <i>Protocol III</i><br>Dexamethasone (PO)<br>Vincristine (IV)<br>Doxorubicin (PI over 1 h)<br>L-Asparaginase (PI over 1 h)<br>Cyclophosphamide (PI over 1 h)<br>Cytarabine (IV)<br>6-Thioguanine (PO)<br>Methotrexate (IT)                         | 10 mg/m <sup>2</sup> /d<br>1.5 mg/m <sup>2</sup> /dose (max 2 mg)<br>30 mg/m <sup>2</sup> /dose<br>10,000 IU/m <sup>2</sup> /dose<br>500 mg/m <sup>2</sup> /dose<br>75 mg/m <sup>2</sup> /dose<br>60 mg/m <sup>2</sup> /d<br>12 mg/dose <sup>b</sup>  | 1-14 <sup>d</sup><br>1, 8<br>1, 8<br>1, 4, 8, 11<br>15<br>17-20, 24-27<br>15-28<br>17, 24 <sup>g</sup>                     |
| <u>Interim Maintenance</u><br>Methotrexate (PO)<br>6-Mercaptopurine (PO)                                                                                                                                                                           | 20 mg/m <sup>2</sup> /dose <sup>h</sup><br>50 mg/m <sup>2</sup> /d <sup>i</sup>                                                                                                                                                                       | once a week<br>daily                                                                                                       |
| <u>Maintenance</u> <sup>i</sup><br>Methotrexate (PO)<br>6-Mercaptopurine (PO)<br>Cranial irradiation                                                                                                                                               | 20 mg/m <sup>2</sup> /dose <sup>h</sup><br>50 mg/m <sup>2</sup> /d <sup>i</sup><br>12 Gy/18 Gy/24 Gy                                                                                                                                                  | once a week<br>daily                                                                                                       |

<sup>a</sup> PO indicates orally; IV, intravenous push; PI, intravenous infusion; IT, intrathecally; adjustments of time schedule were allowed if clinical condition and bone marrow recovery were inadequate

<sup>b</sup> Doses of IT drugs were adjusted for children <3 years of age

<sup>c</sup> Randomization

<sup>d</sup> Steroids were tapered over 9 additional days

<sup>e</sup> Additional IT therapy on day 18 and 27 was administered to patients with CNS status CNS3 and CNS2 or TLP+

<sup>f</sup> A loading dose of 10% was infused over 30 min, the remaining 90% over 23.5 h. Leucovorin rescue was given at hour 42, 48, and 54 (each 15 mg/m<sup>2</sup>). Doses of leucovorin rescue were adjusted, if MTX levels were > 1.0 µmol/l at hour 42 or later. If the MTX level at hour 54 was > 0.25 µmol/l, rescue was continued at six-hour intervals until MTX levels were ≤ 0.25 µmol/l.

<sup>g</sup> Patients with CNS status CNS 3 received additional IT therapy on day 5 in element HR-2', on day 1 and 18 in Protocol II and on day 1 in Protocol III

<sup>h</sup> Doses were adjusted to WBC (target range 2.0-3.0 x10<sup>9</sup>/L)

<sup>i</sup> Maintenance was given from the end of intensive chemotherapy until 104 weeks after diagnosis

**Supplementary table 2. Definition of hepatic sinusoidal obstruction syndrome according to the toxicity working group of the Ponte di Legno consortium.**

Fulfilment of at least three of five, otherwise unexplained, criteria\*:

- Hepatomegaly
- Hyperbilirubinaemia more than UNL
- Ascites
- Weight gain of at least 5%
- Thrombocytopenia (transfusion-resistant and/or otherwise unexplained by treatment)

Grading:

- Mild: bilirubin less than 103  $\mu\text{mol/L}$  and weight gain less than 5%
- Moderate: bilirubin 103–342  $\mu\text{mol/L}$  and/or weight gain more than 5% or ascites
- Severe: bilirubin more than 342  $\mu\text{mol/L}$  and/or respiratory or renal failure or hepatic encephalopathy
- Death due to sinusoidal syndrome

\*Doppler ultrasound could document changes in hepatic portal venous flow and rule out alternative causes, but normal findings do not exclude sinusoidal obstruction syndrome

**Supplementary table 3. Comparison of characteristics of 1566 patients with and without hepatic sinusoidal obstruction syndrome (SOS) reported as severe adverse event during treatment of acute lymphoblastic leukemia (ALL) on the non-interventional arms of trial AIEOP-BFM ALL 2009.**

|                                               | Patients with reported hepatic SOS<br>(n = 9)<br><br>n (%) | Patients without reported hepatic SOS<br>(n = 1557)<br><br>n (%) | <sup>e</sup> P |
|-----------------------------------------------|------------------------------------------------------------|------------------------------------------------------------------|----------------|
| Gender                                        |                                                            |                                                                  |                |
| Male                                          | 5 (55.6)                                                   | 889 (57.1)                                                       | 0.999          |
| Female                                        | 4 (44.4)                                                   | 668 (42.9)                                                       |                |
| Age at diagnosis (years)                      |                                                            |                                                                  |                |
| <10                                           | 8 (88.9)                                                   | 1213 (77.9)                                                      | 0.693          |
| ≥10                                           | 1 (11.1)                                                   | 344 (22.1)                                                       |                |
| Initial WBC <sup>a</sup> (10 <sup>9</sup> /l) |                                                            |                                                                  |                |
| <50                                           | 7 (77.8)                                                   | 1320 (84.8)                                                      | 0.634          |
| ≥50                                           | 2 (22.2)                                                   | 236 (15.2)                                                       |                |
| n.a.                                          | -                                                          | 1 (0.1)                                                          |                |
| Immunophenotype                               |                                                            |                                                                  |                |
| B cell precursor                              | 8 (88.9)                                                   | 1380 (88.6)                                                      | 0.999          |
| T cell precursor                              | 1 (11.1)                                                   | 173 (11.1)                                                       |                |
| other                                         | -                                                          | -                                                                |                |
| n.a.                                          | -                                                          | 4 (0.3)                                                          |                |
| CNS disease <sup>b</sup>                      |                                                            |                                                                  |                |
| no                                            | 8 (88.9)                                                   | 1454 (93.4)                                                      | 0.178          |
| yes                                           | 1 (11.1)                                                   | 31 (2.0)                                                         |                |
| n.a.                                          | -                                                          | 72 (4.6)                                                         |                |
| <i>ETV6-RUNX1</i> rearrangement               |                                                            |                                                                  |                |
| negative                                      | 7 (77.8)                                                   | 1102 (70.8)                                                      | 0.999          |
| positive                                      | 2 (22.2)                                                   | 446 (28.6)                                                       |                |
| n.a.                                          | -                                                          | 9 (0.6)                                                          |                |
| Prednisone response <sup>c</sup>              |                                                            |                                                                  |                |
| good                                          | 9 (100)                                                    | 1547 (99.4)                                                      | 0.999          |
| poor                                          | -                                                          | -                                                                |                |
| n.a.                                          | -                                                          | 10 (0.6)                                                         |                |
| Risk group <sup>d</sup>                       |                                                            |                                                                  |                |
| SR                                            | 4 (44.4)                                                   | 800 (51.4)                                                       | 0.999          |
| MR                                            | 4 (44.4)                                                   | 677 (43.5)                                                       |                |
| HR                                            | -                                                          | -                                                                |                |
| other                                         | 1 (11.1)                                                   | 80 (5.1)                                                         |                |

|              |          |             |       |
|--------------|----------|-------------|-------|
| <i>TPMT</i>  |          |             |       |
| wildtype     | 6 (66.7) | 1447 (19.0) |       |
| heterozygous | 3 (33.3) | 105 (6.7)   | 0.020 |
| deficient    | -        | 5 (0.3)     |       |

<sup>a</sup>WBC: white blood cell count

<sup>b</sup>CNS positive: puncture nontraumatic, >5 WBC/ $\mu$ L cerebrospinal fluid with identifiable blasts

<sup>c</sup>Good: <1000 leukemic blood blasts/ $\mu$ l on treatment day 8, poor:  $\geq$ 1000/ $\mu$ l

<sup>d</sup>Risk group stratification included DNA-based minimal residual disease (MRD) analysis, SR patients were MRD-negative on treatment days 33 and 78, HR patients had residual disease of  $\geq 5 \times 10^{-4}$  on treatment day 78 or slow early response (SER, only applicable to B cell precursor ALL) as defined by MRD of  $\geq 10^{-3}$  on day 33 and positivity on day 78, all the remaining MRD results were stratified into the MR group, further HR criteria were prednisone poor-response, flow cytometry-based MRD on day 15 of  $\geq 10\%$  lymphoblasts in the one marrow or  $\geq 5\%$  leukemic blasts in the bone marrow by cytomorphological assessment on day 33, positivity for t(4;11) or its molecular equivalent (*MLL-AF4* gene fusion), or hypodiploidy (defined by < 45 chromosomes and/or DNA index of < 0.8) were stratified into the high-risk group independent of their MRD results

<sup>e</sup>P Fisher's exact test

<sup>f</sup>Deficient patients were treated by therapeutic drug-monitoring and excluded from risk analyses

**Supplementary figure 1. Overview of included patients and performed analyses in the derivation and replication cohorts.**

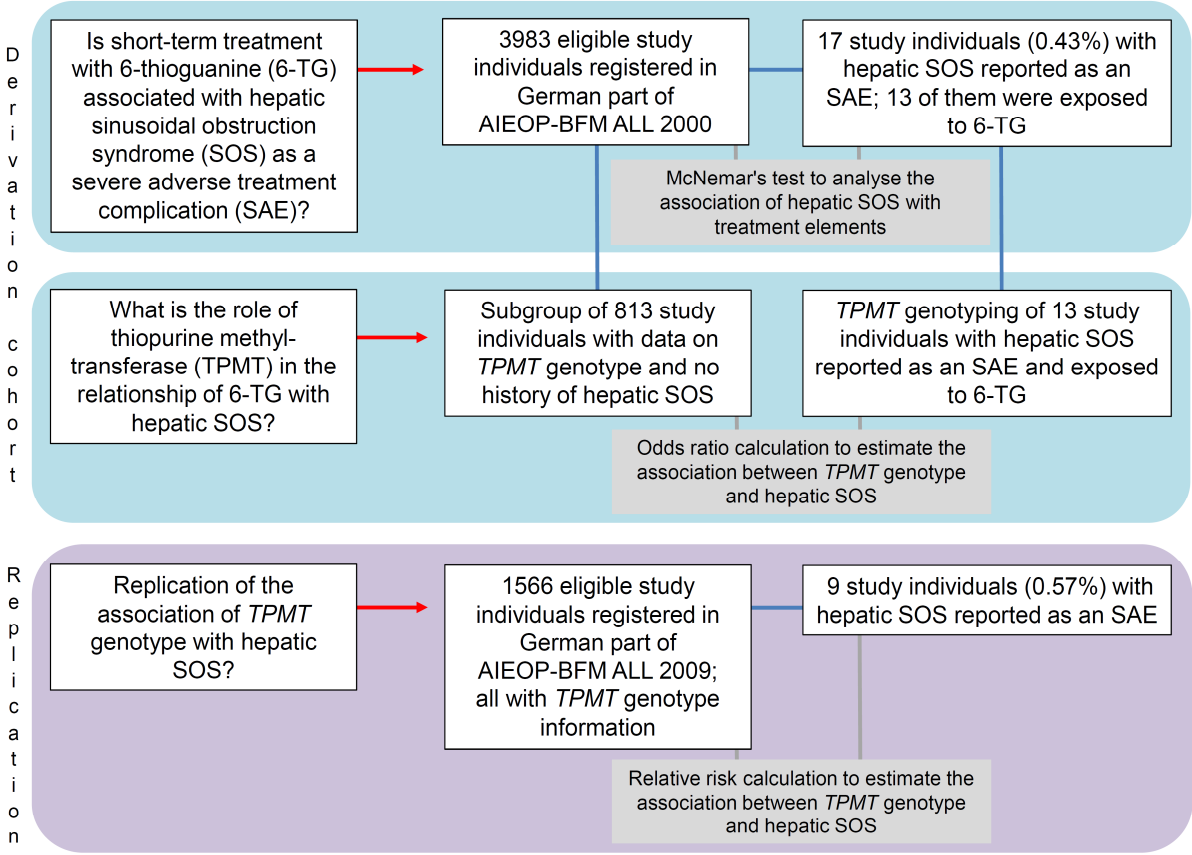

Supplement: 41375_2021_1203_MOESM1_ESM.pdf [file 41375_2021_1203_MOESM1_ESM.pdf]
